# Supplementary material for: Polyhydroxyalkanoate‐associated phasins as phylogenetically heterogeneous, multipurpose proteins
Source: PubMed Central journal article supplement (PMC5658603; doi:10.1111/1751-7915.12718), 2017-04-20

C) Pfam family PF09650 - 47 seed sequences (173 sequences in total)

JalView consensus sequence and JPred secondary structure prediction:

```
1                                                                 70
IHIEREHSLG LAEAREAAEKLAEKLEEEFGGKVAAGLECTWEEGETGDTLRFKRSGAMGQGVDGTLEVGP
-EEE-----HHHHHHHHHHHHHHHHHHHH-----EEEEEE-----EEEEEEEE-----EEEEEE--

71                                                                 104
DKVRLDAKLGFLWRSFAFKGRIESEIEKNLTKLL
-EEEEEE--HHHHHH-HHHHHHHHHHHHHHH--
```

**Subsequence-1** (residues 11-29)  
Mean hydrophobic moment  $\langle \mu_H \rangle = 0.45$

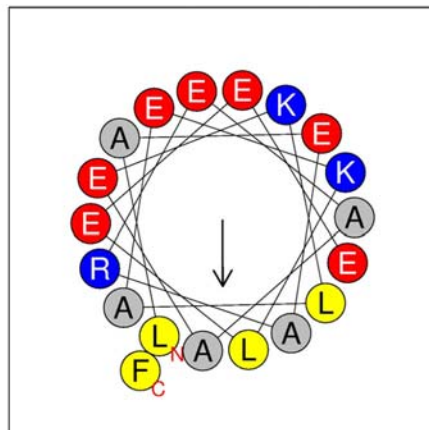

Supplement: MBT2-10-1323-s001.pdf [file MBT2-10-1323-s001.pdf]
